# Supplementary material for: Virophages and Their Interactions with Giant Viruses and Host Cells
Source: MDPI journal article supplement (doi:10.3390/proteomes6020023), 2018-05-22
Supplement: s1 [file s1]

## **Virophages and their interactions with giant viruses and host cells**

Haitham Sobhy

**Supplementary Information – SI-1 (this document):** It contains supplementary material and methods, supplementary tables and supplementary figures.

**Supplementary Information – SI-2 (Excel file):** It contains lists of the motif-containing proteins in each virophage proteome.

### **Supplementary Materials and Methods**

The protein sequences of twelve virophages were downloaded from NCBI GenBank database. Only virophages of complete genomes (as in June, 2017) were downloaded. The virophage names and GenBank IDs are listed in table S1. The twelve virophages are Mavirus, Sputnik, Sputnik 2 and 3, Zamilon, Phaeocystis globosa virus virophage (PgVV), Dishui lake virophage 1 (DSL1V), Organic Lake virophage (OLV), Qinghai Lake virophage (QLV) and Yellowstone Lake virophage 5, 6 and 7 (YSLV5, -6 and -7, respectively). The fasta file formatted protein sequences were processed by Shetti-Motif tool (Sobhy 2017), as suggested in the user manual. The tool performs exact text-mining search for built-in 130+ functional motifs that previously experimentally validated for other viruses, supplementary information SI-1. The list of the motifs and their functions are previously reviewed in (Sobhy 2016, Sobhy 2017), table S1. The output file, which contains the number of motif-containing proteins (MCPs) in each virophage, were then collected and a collective table was constructed, table S1. To calculate enrichment of the MCPs in a proteome, the numbers of MCPs were calculated then normalized (i.e. percent) to the total number of the proteins encoded by a virophage. If a protein harbors multiple sets of the same motif, only one instance is considered.

For statistical analysis, Spearman rank correlations was calculated using R statistics tool (<https://www.r-project.org/>), table 1. The heat-map and clustering based on the Euclidean distances and average linkage was performed using MeV tool (<http://mev.tm4.org/>), Fig. 1.

### **References**

- Nguyen Ba, A. N., et al. (2009). "NLStradamus: a simple Hidden Markov Model for nuclear localization signal prediction." *BMC Bioinformatics* **10**: 202.
- Sobhy, H. (2016). "A Review of Functional Motifs Utilized by Viruses." *Proteomes* **4**(1): 3.
- Sobhy, H. (2017). "A bioinformatics pipeline to search functional motifs within whole-proteome data: a case study of poxviruses." *Virus Genes* **53**(2): 173-178.

## Supplementary Figures

**Figure S1.** Examples of ITAM motif sequences (Yxx[IL]<sub>x6-12</sub>Yxx[IL], InterPro ID: IPR012316) in Sputnik and Mavirus virophages.

The protein sequences (in FASTA format) are listed below. The ITAM motif is in a bold font, underlined and highlighted in yellow. In Sputnik, the ITAM is flanked by the Y<sub>x2-3</sub>L motif (in bold and underlined), which is known as a signature of ITAM motif and used during virus budding and egress. The V9 protein is a Leucine- and tyrosine-rich protein (about 14% and 11% of the proteins length, respectively). For the full list of the motif sequence, see SI-2. For additional information regarding the amino acid coverage within virophages' proteins, see table S3 and Figure S2

```
>ACF16993.1|V9 Sputnik
  1 MKELKYEEKVALSNFDILEMLDNKAEIVLYPNLIKYETID 40
 41 DVLGPYGACVLLFEAKKNYGHWCCLFKREDNSIEFFNSYG 80
 81 GYPDNSLKYIPLHYREISNQYYPYLSILLLKYPHKLYYNE 120
121 FKFQKRANDIRTCGRWCVLRLLLKHLDIYEFKKYVDDMCS 160
161 YYKVTTPDELVTMITI 175

>ADZ16416.1|hypothetical protein Mavirus
  1 MKQYIWLNETIKSNKQLAGPRGSYKRPVSDIFRSSTILD 40
 41 PDKNYLLIVEEFHLHKIRLPLFKPAGHDYQVGIFNRSTDE 80
 81 IMGVREVDVFSTFVDEDEGYMYDYVDVGTAINETLAGLCDGI 120
121 IGEEDIPVFSFNKHSKKFEITTTENFRNGHFIMFNDDMRV 160
161 DFNSFEFDDIDEEYSLVILNEDVETQDASTLEFLTPISHI 200
201 VIESNDLPVSYELLPSISKNTTISDNTGVFLTNYKYLQQN 240
241 NQDYNSILFRVENSSNKYHNILQTNFNRNLSFTTIYDYN 280
281 EKHPLTLLPQTVIQLKLLFESID 303
```



## Supplementary Tables

**Table S1 (Excel file).** The experimentally validated functional motif table.

The table shows the enrichment of the motif-containing proteins to the proteome. The number of motif-containing proteins were counted, and then normalized to the total number of proteins within the proteome, i.e. percent to the total number of proteins. The table was used to construct Fig. 1 in the main text. For the definition of the residue symbols, see table S4.

**Table S2 (Excel file).** The predicted KR-rich motifs (a predicted NLS motif) in PgV using sequence search by Shetti-Motif (Sobhy 2017) and NLStradamus tools (Nguyen Ba, Pogoutse et al. 2009) (<http://www.moseslab.csb.utoronto.ca/NLStradamus/>).

**Table S3 (Excel file).** The amino acid residue coverage within each protein encoded by virophages.

The table contains (i) the coverage values of amino acid residues within each virophage protein. (ii) The average values of the residues coverages and standard deviations within the whole proteome. (iii) The final summary table of the average coverages. The largest averages are considered as the most abundant amino acids in the proteome. The table was used to construct Figure S2.

**Table S4.** The amino acid residue symbols used for searching functional motifs, adopted from Shetti-Motif tool, adopted from (Sobhy 2017).

| Symbol     | Representative Motif  | Residues                                    | Physical properties     |
|------------|-----------------------|---------------------------------------------|-------------------------|
| []         | P[ED]                 | P, and (E or D) residues $\approx$ PE or PD |                         |
| { }        | P{R}                  | P, and any residue but R                    |                         |
| numbers    | T(2), T(2-5) or T(3,) | T is repeated 2, 2-5 or $>3$ times          |                         |
| - “hyphen” | [ED]                  | E or D                                      | Negative - Acidic       |
| +          | [HKR]                 | H, K or R                                   | Positive - Basic        |
| =          | [ST]                  | S or T                                      | Alcohol                 |
| *          | [CM]                  | C or M                                      | Sulfur containing       |
| ?          | [IVL]                 | I, V or L                                   | Aliphatic               |
| &          | [AGS]                 | A, G or S                                   | Tiny                    |
| @          | [FHWY]                | F, H, W or Y                                | Aromatic                |
| %          | [DEHKNQRST]           | D, E, H, K, N, Q, R, S or T                 | Polar / hydrophilic     |
| !          | [ACFGVLIPWY]          | A, C, F, G, V, L, I, P, W, M or Y           | Non-polar / hydrophobic |
| #          | [CWNQSTYKRHDE]        | C, W, N, Q, S, T, Y, K, R, H, D or E        | H-bond                  |
| x          | Any amino acid        | Any amino acid                              | Any amino acid          |
